# Supplementary material for: Fast-response humidity sensor based on laser printing for respiration monitoring
Source: Royal Society of Chemistry journal article supplement (doi:10.1039/c9ra10409g), 2020-01-01
Supplement: c9ra10409g1.pdf [file c9ra10409g1.pdf]

## Supporting Information

### **Fast-Response Humidity Sensor based on Laser Printing for Respiration Monitoring**

Gong Wang<sup>a</sup> Yang Zhang<sup>b</sup> Han Yang<sup>a,\*</sup> Wei Wang<sup>a</sup> Yun-Zhi Dai<sup>a</sup> Li-Gang Niu<sup>a</sup>  
Chao Lv<sup>a</sup> Hong Xia<sup>a,\*</sup> Tao Liu<sup>c,\*</sup>

<sup>a</sup> State Key Laboratory of Integrated Optoelectronics, College of Electronic Science and Engineering, Jilin University, 2699 Qianjin Street, Changchun, 130012, People's Republic of China.

<sup>b</sup> Department of Experimental Pharmacology and Toxicology, School of Pharmacy, Jilin University, Changchun, Jilin Province, China.

<sup>c</sup> Department of Rheumatology, First Hospital, Jilin University, Changchun 130012, China.

▪ \* E-mails: yanghan@jlu.edu.cn, hxia@jlu.edu.cn, 9835140@qq.com.

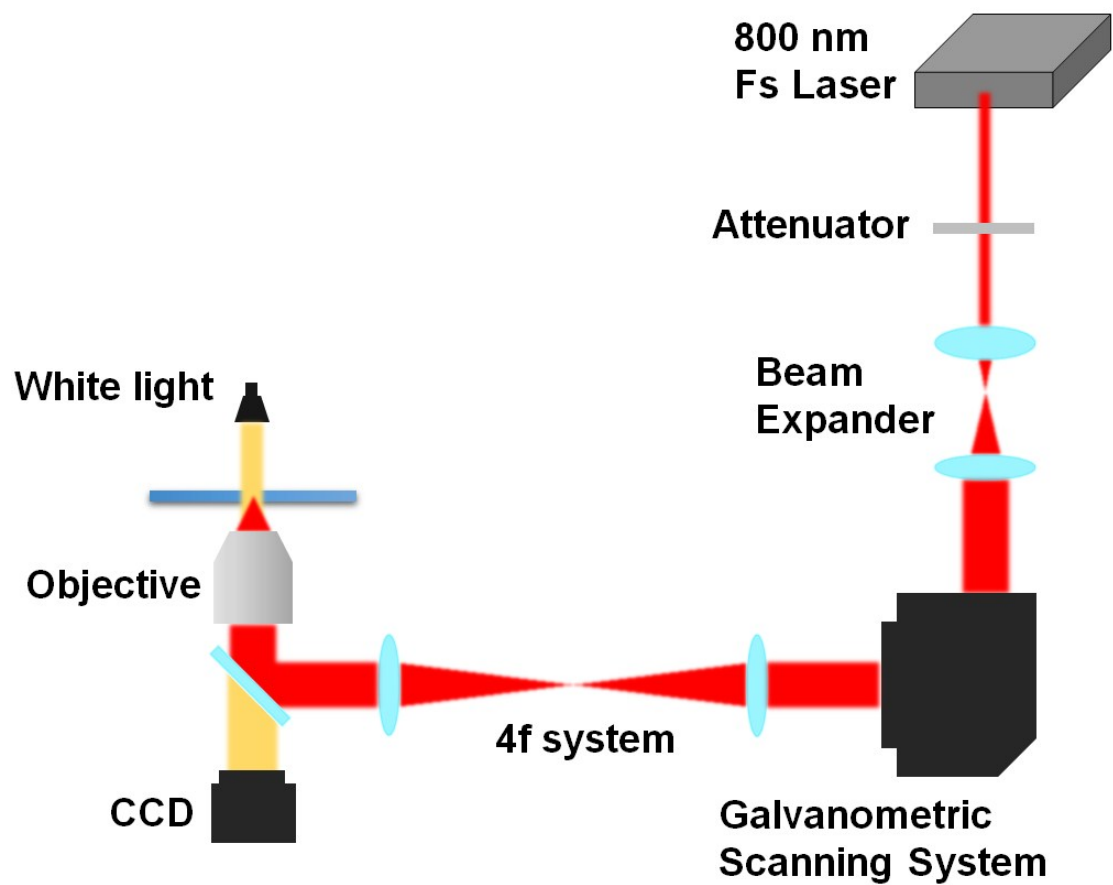

**Fig. S1** Schematic illustration of the femtosecond laser printing system.

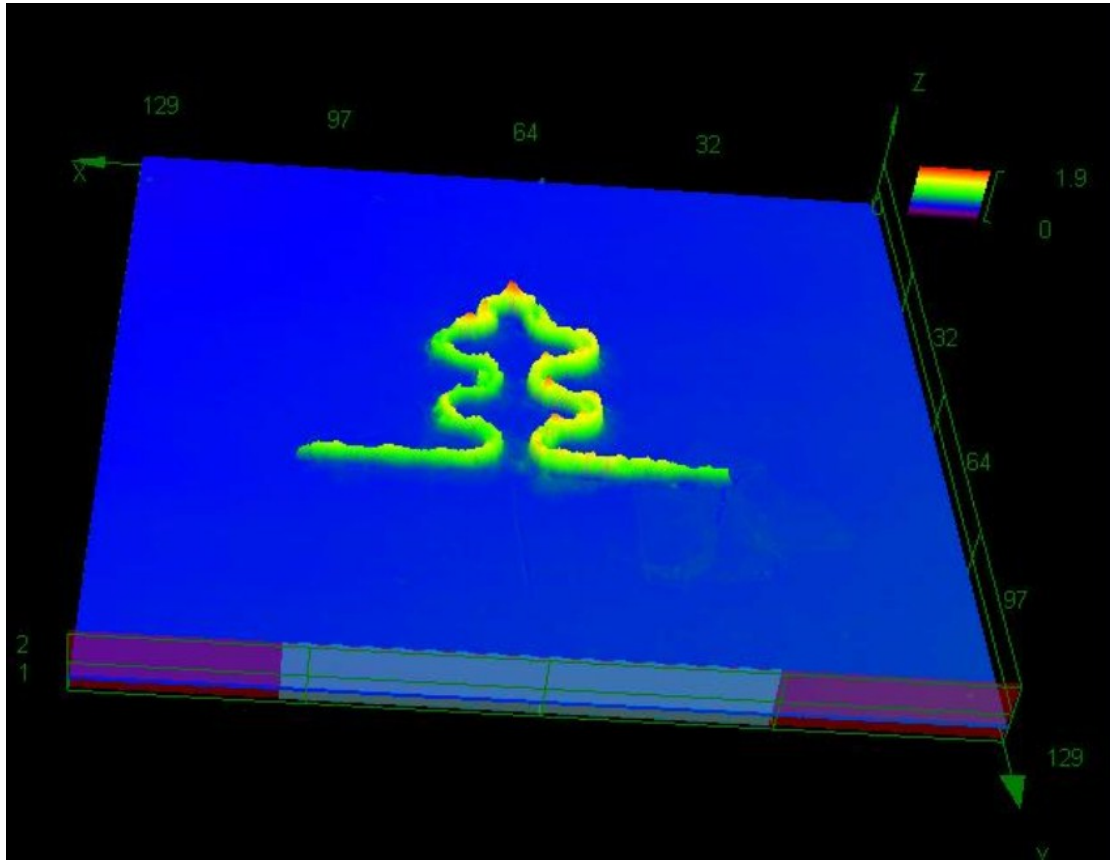

**Fig. S2** Laser scanning confocal microscope image of the PEDOT: PSS micron line fabricated by laser printing.

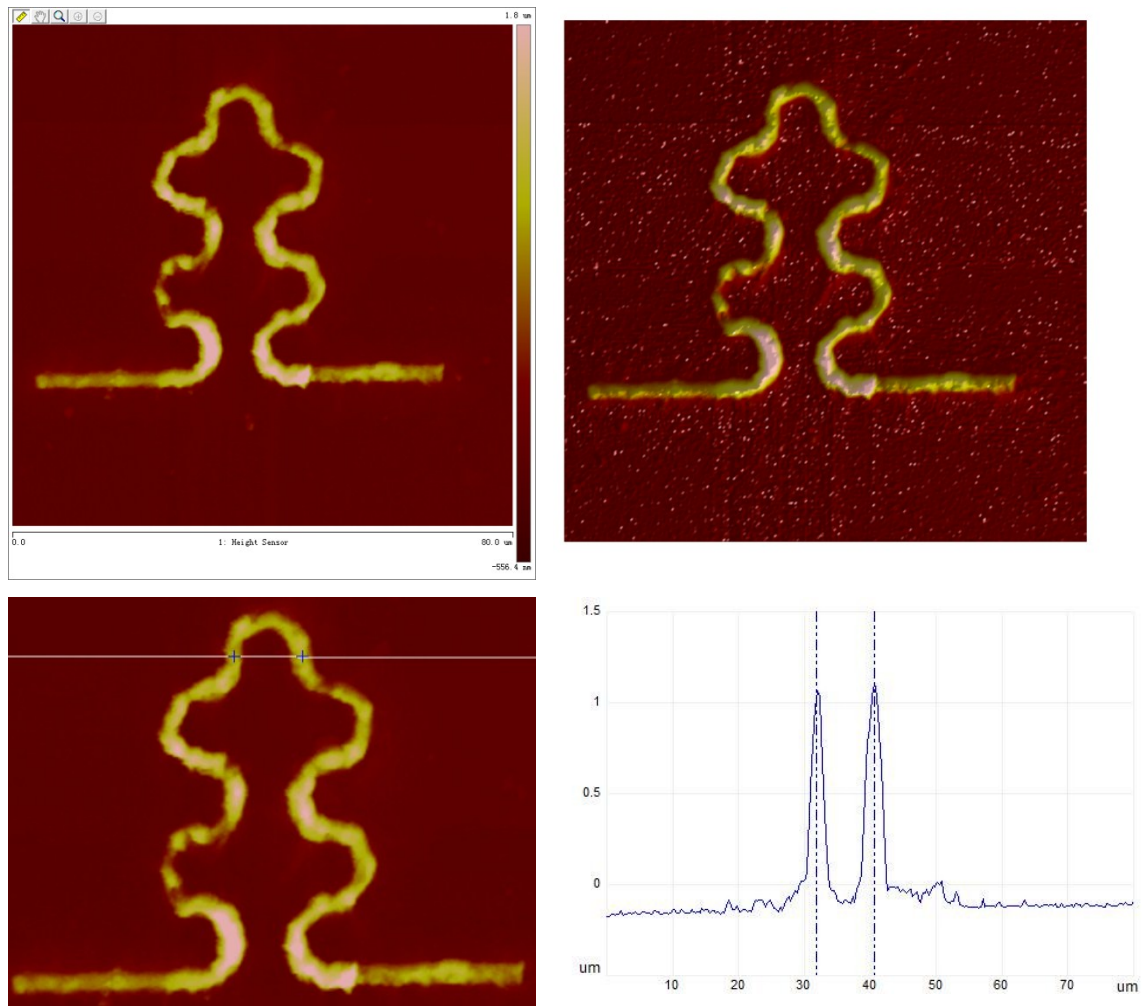

**Fig. S3** Atomic force microscopy images of the PEDOT: PSS micron line fabricated by laser printing.

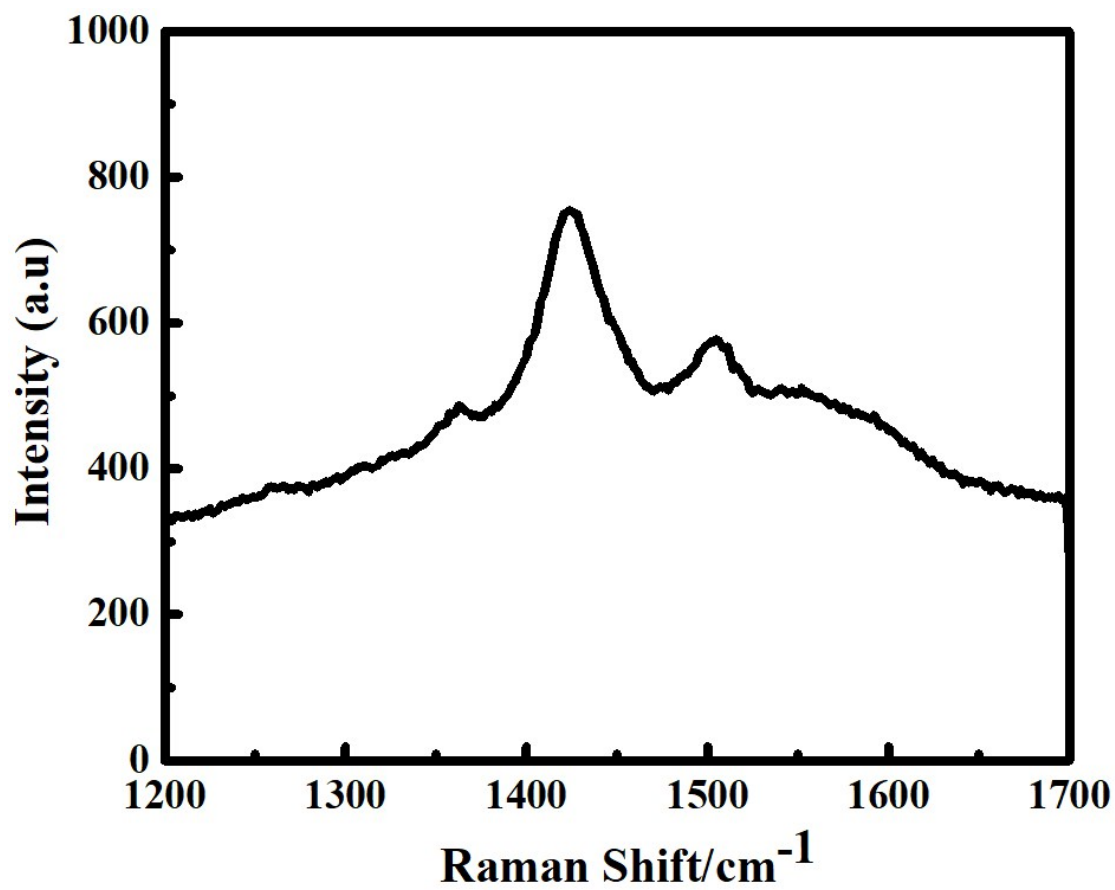

**Fig. S4** The Raman spectrum of the PEDOT: PSS micron line fabricated by laser printing.

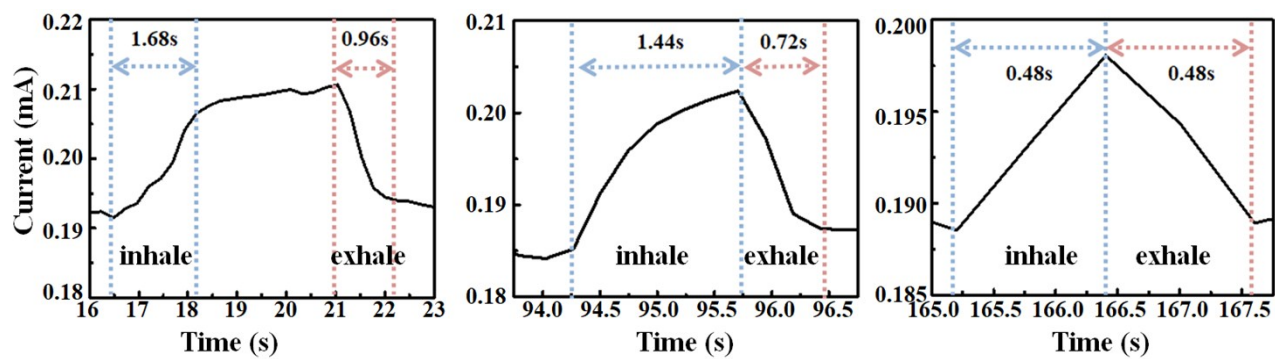

**Fig. S5** The typical one cycle breathing with exhale and inhale process. (a) Slow, (b) Normal, (c) Fast..

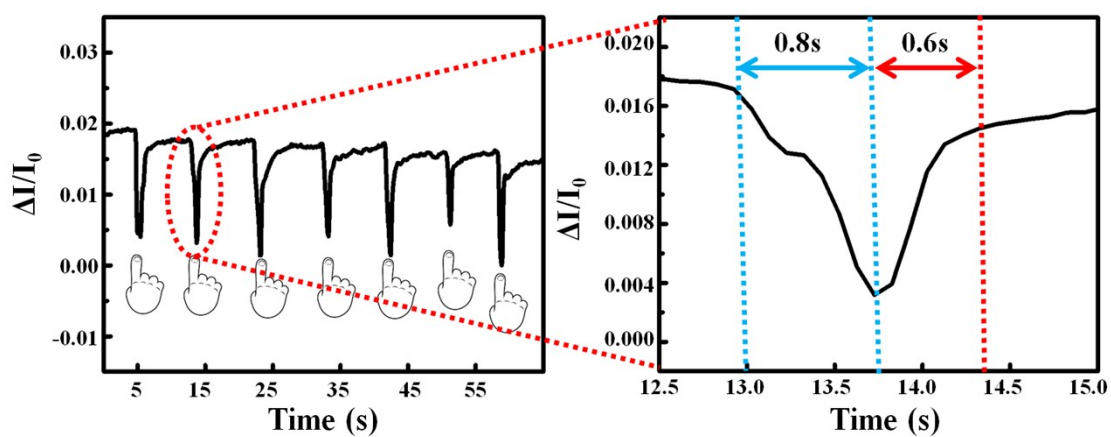

**Fig. S6** The response of PEDOT:PSS humidity sensor to finger slipping over.

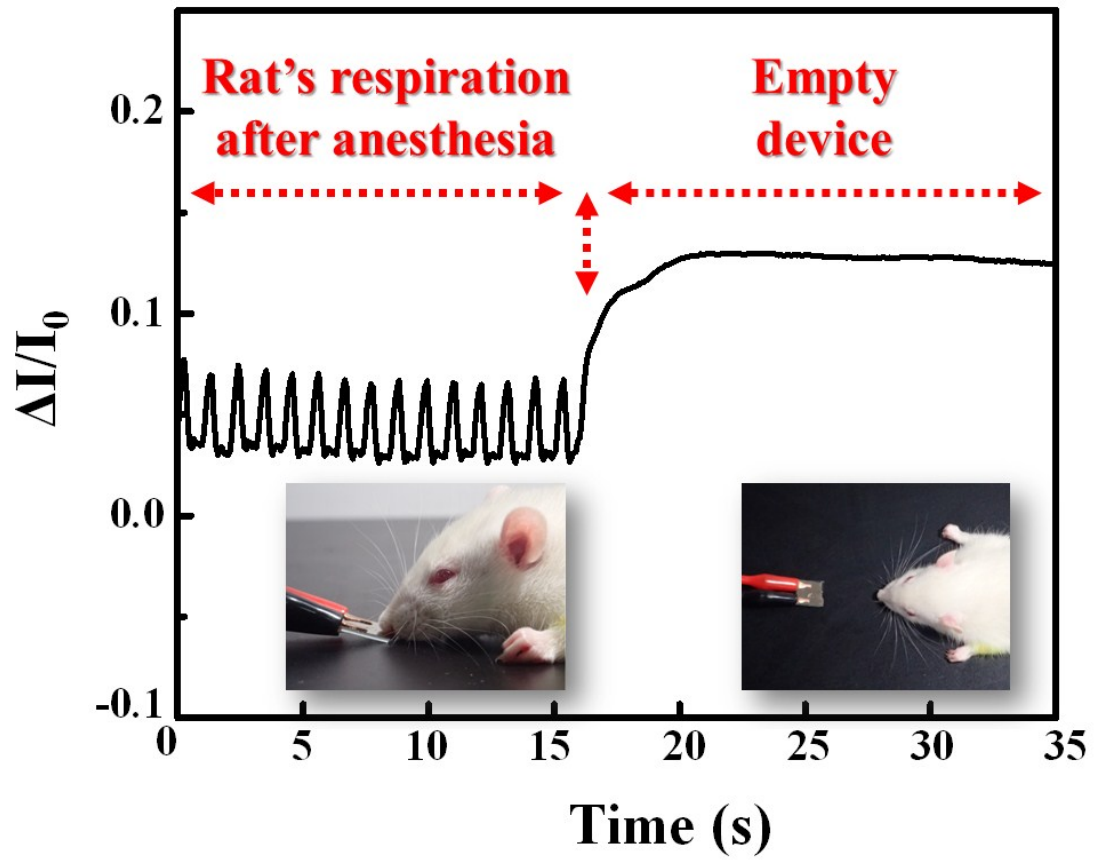

Fig. S7 Respiratory monitoring curves of anesthetized rat.
